# Supplementary material for: Induction of Myogenic Differentiation Improves Chemosensitivity of Chemoresistant Cells in Soft-Tissue Sarcoma Cell Lines
Source: Hindawi journal article supplement (doi:10.1155/2020/8647981), 2020-03-26
Supplement: f1 [file 8647981.f1.pdf]

1 Supplementary Materials

2 Figure S1

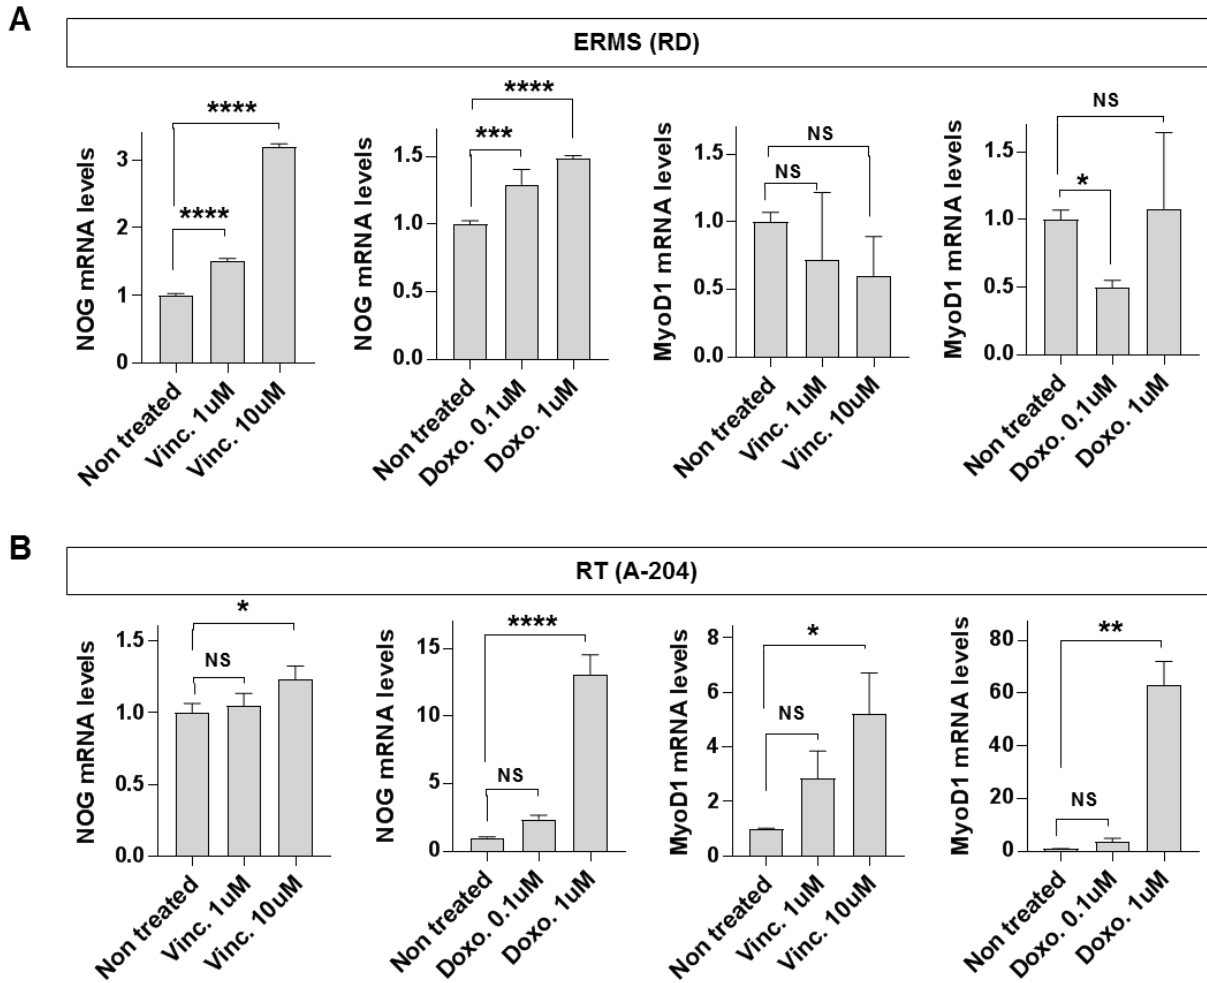

3

4

5 **Figure S2**

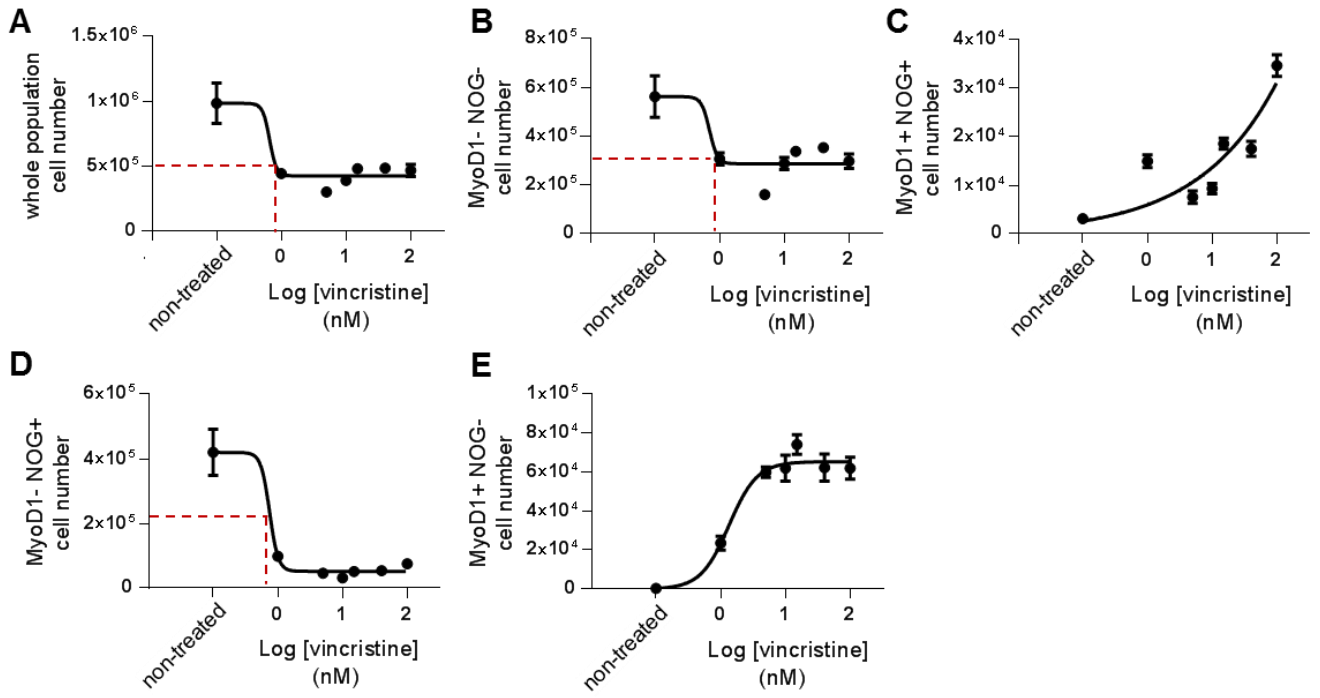

6

7 **Figure S3**

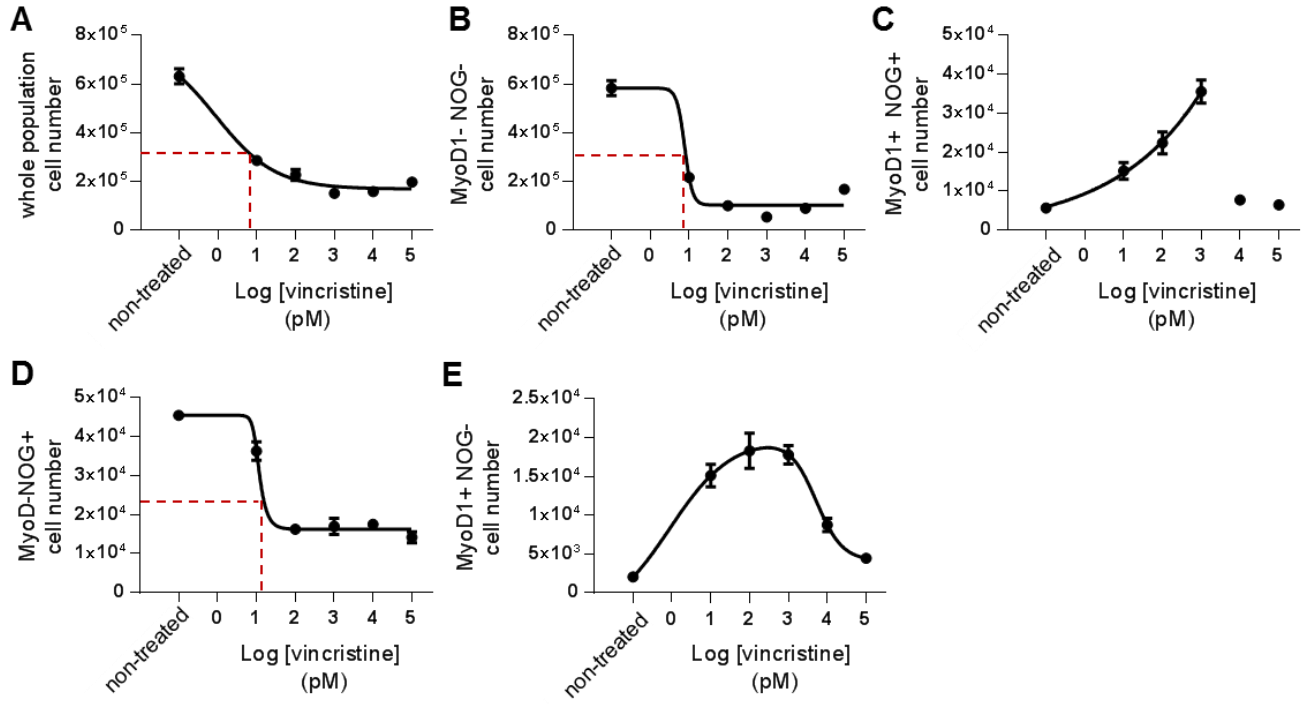

8

## 9 **Supplementary figures legends**

10 **Figure S1. Relative MyoD1 and Noggin mRNA expression levels in treated ERMS and RT**  
11 **cell lines.** Histograms show relative expression levels of Noggin (NOG) and MyoD1 normalized  
12 to non-treated control in **(A)** ERMS cell line RD and in **(B)** RT cell line A-204 (Mean  $\pm$  standard  
13 deviation, N=3). \* $p < 0.05$  \*\* $p < 0.01$  \*\*\* $p < 0.001$  \*\*\*\* $p < 0.0001$ , ANOVA with Tukey's multiple  
14 comparisons test).

15 **Figure S2. Dose reponse curves of ERMS RD cell line to vincristine treatment.** Drug  
16 treatment dose responses for **(A)** whole cell population,  $R^2=0.85$ ,  $IC_{50}=0.7$  nM **(B)** double negative  
17 (MyoD1- NOG-),  $R^2=0.8$ ,  $IC_{50}=0.5$  nM **(C)** double positive (MyoD1+ NOG+),  $R^2=0.76$  **(D)** MyoD1-  
18 NOG+ (single positive) subpopulation,  $R^2=0.85$ ,  $IC_{50}=0.4$  nM **(E)** MyoD1+ NOG- (single positive)  
19 subpopulation,  $R^2=0.95$ . Plots represent viable cell numbers versus drug concentrations  
20 transformed to logarithmic scale. Best fit curves (Mean  $\pm$  Standard Deviation, N=3) are shown.  
21 Non-linear regression using least squares (ordinary) fit was applied for (A, B, D, E), and  
22 exponential growth using least squares (ordinary) fit for (C). Red dotted lines highlight the  
23 calculated  $IC_{50}$ .

24 **Figure S3. Dose reponse curves of RT A-204 cell line to vincristine treatment.** Drug  
25 treatment dose responses for **(A)** whole cell population,  $R^2=0.98$ ,  $IC_{50}=0.70$  pM **(B)** double  
26 negative (MyoD1- NOG-),  $R^2=0.96$ ,  $IC_{50}=0.8$  pM **(C)** double positive (MyoD1+ NOG+),  $R^2=0.97$ ,  
27 **(D)** MyoD1-, NOG+ (single positive) subpopulation,  $R^2=0.86$ ,  $IC_{50}=17.7$ pM **(E)** MyoD1+ NOG-  
28 (single positive) subpopulation,  $R^2=0.97$ . Plots represent viable cell numbers versus drug  
29 concentrations transformed to logarithmic scale. Best fit curves for 3 replicate experiments (Mean  
30  $\pm$  Standard Deviation) are shown. Non-linear regression dose-response (four parameters) using  
31 least squares (ordinary) fit was applied for (A, B, D), exponential growth using least squares  
32 (ordinary) fit for (C), and non-linear regression bell-shaped dose-response using least squares  
33 (ordinary) fit was applied for (E). Red dotted lines highlight the calculated  $IC_{50}$ .

## 34 **Supplementary methods**

### 35 **Real time qRT-PCR**

36 Total RNA was extracted using RNAeasy Plus Mini Kit (Qiagen) according to the manufacturer's  
37 instructions. Optional on-column DNA digestion step was performed with RNase-Free DNase  
38 according to the manufacturer's instructions (Qiagen). Reverse transcription was performed with  
39 SuperScript IV First Strand Synthesis (Invitrogen). Real-time RT-PCR was performed with a  
40 SYBR green master Mix kit (Applied Biosystems). Relative mRNA levels were normalized to  
41 HPRT and calculated by  $\Delta\Delta CT$  method.

42 The primers are listed below:

43 MYOD1 (F: 5'-TGCTGGACAGGCAGTCTA-3', R: 5'-CTCCGACGGCATGATGG-3')

44 NOG (F:5'-GCAGCGTCTCGTTCAGAT-3', R: 5'-CCAGCACTATCTCCACATCC-3')

45 HPRT (F: 5'-GCGATGTCAATAGGACTCCAG-3', R:5'-TTGTTGTAGGATATGCCC-  
46 TTG A-3'

### 47 **Drug dose-response curves**

48 Cell lines were seeded at  $0.3 \times 10^6$  cells per well and treated with drug for 48 hours. RD cells  
49 were treated with 1nM, 5nM, 10nM, 15nM, 40nM and 100nM of vincristine, A-204 cells - with  
50 0.01nM, 0.1nM, 1nM, 10nM and 100nM of vincristine. Cells were collected at 48 hours after  
51 twice washing wells with PBS to remove dead cells. Cells absolute numbers and viability were  
52 obtained using Chemometec NC-200. Then cells were immediately processed for intracellular  
53 flow cytometry staining as described in the corresponding Material and Methods section.

54 Percentages of each cell subpopulation (MyoD1- NOG-, MyoD1+ NOG+, MyoD1- NOG+ and  
55 MyoD1+ NOG-) was obtained by flow cytometry analysis and absolute numbers of these cell  
56 subpopulations were calculated.
